# Supplementary material for: Murine cytomegalovirus degrades MHC class II to colonize the salivary glands
Source: PubMed Central journal article supplement (PMC5831752; doi:10.1371/journal.ppat.1006905), 2018-02-15

Figure S2

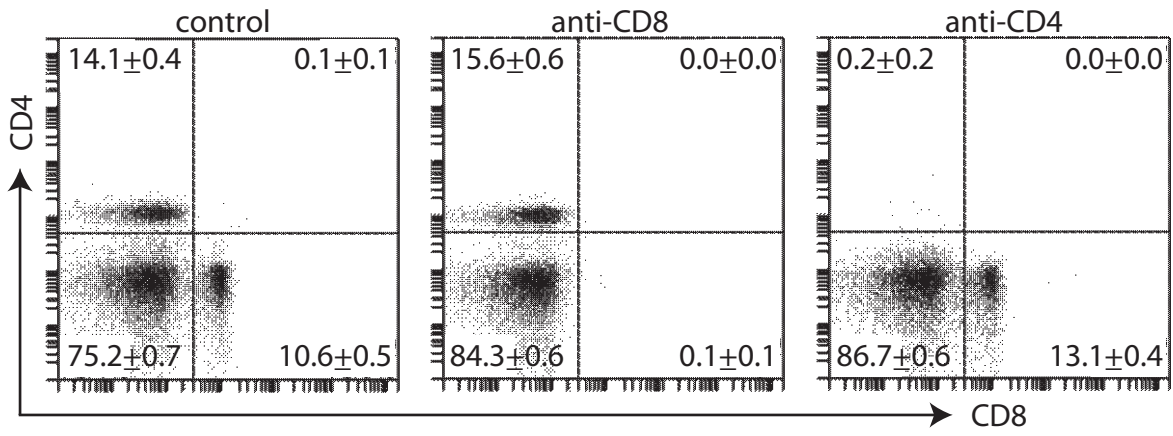

Supplement: ppat.1006905.s002.pdf [file ppat.1006905.s002.pdf]
